# Supplementary material for: miR-146a-5p, miR-223-3p and miR-142-3p as Potential Predictors of Major Adverse Cardiac Events in Young Patients with Acute ST Elevation Myocardial Infarction—Added Value over Left Ventricular Myocardial Work Indices
Source: MDPI journal article supplement (doi:10.3390/diagnostics12081946), 2022-08-12
Supplement: s1 [file s1]

# SUPPLEMENTARY MATERIAL FOR MANUSCRIPT

## miR-146a-5p, miR-223-3p and miR-142-3p as Potential Predictors of Major Adverse Cardiac Events in Young Patients with Acute ST Elevation Myocardial Infarction - Added Value over Left Ventricular Myocardial Work Indices

Sorted by the order of appearance in main manuscript:

**Table S1.** Echocardiographic parameters at baseline and at follow up in the entire population.

|                             | Population at baseline | Population at follow up | P value      |
|-----------------------------|------------------------|-------------------------|--------------|
| 2D LVEDV (ml)               | 103.51±23.67           | 114.33±31.08            | <b>0.002</b> |
| 2D LVESV (ml)               | 61.27±22.26            | 60.63±27.04             | <b>0.772</b> |
| 2D EF (%)                   | 42.08±7.721            | 47.59±8.5               | <b>0.000</b> |
| 3D LVEDV (ml)               | 110.85±24.4            | 121.5±26.85             | 0.000        |
| 3D LVESV (ml)               | 64.82±22.67            | 63.17±23.55             | 0.256        |
| 3D LVEF (%)                 | 42.78±8.23             | 49.17±7.71              | <b>0.000</b> |
| LV GLS                      | -13.5±3.47             | -14.9±3.65              | <b>0.011</b> |
| LV mechanical dispersion    | 67.84±19.27            | 65.67±30.91             | <b>0.656</b> |
| E/e' (LV filling pressures) | 8.57±2.72              | 8±3.14                  | <b>0.248</b> |
| GWI                         | 1180.29±326.58         | 1318.4±360.2            | <b>0.007</b> |
| GCW                         | 1493±335.65            | 1663.29±412.47          | <b>0.015</b> |
| GWW                         | 182.88±109.62          | 181.51±95.44            | <b>0.943</b> |
| GWE                         | 87.55±6.95             | 90±6.49                 | <b>0.004</b> |

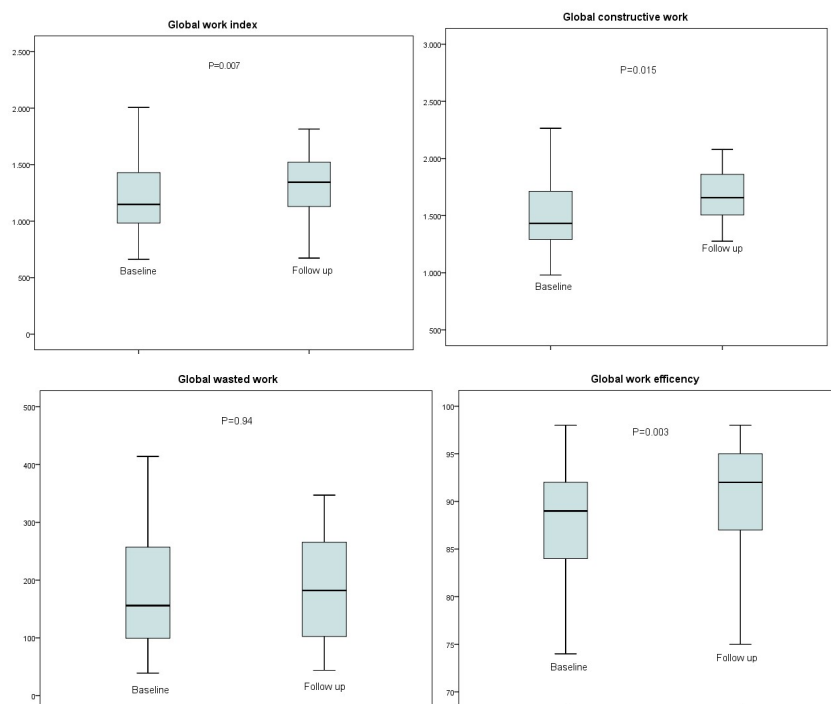

**Figure S1.** Changes in myocardial work indices after STEMI (baseline and 6 months follow up): GWI (upper left), GCW (upper right), GWW (lower left), GWE (lower right).

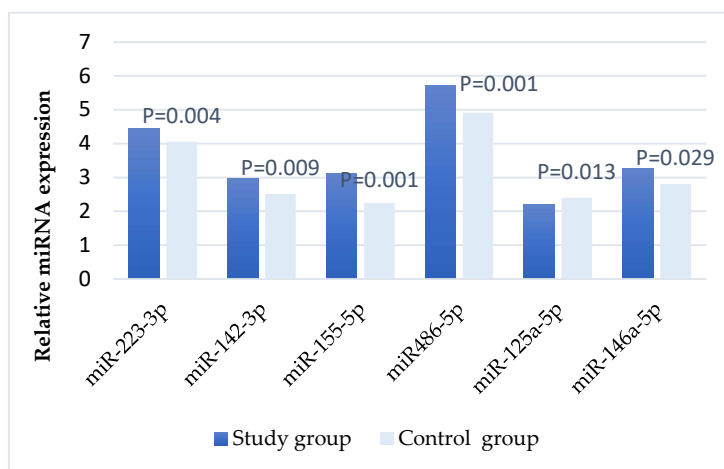

**Figure S2.** miRNA levels at baseline in the study population and in the control group.

**Table S2.** COX univariate regression for the occurrence of MACE.

|                                     | Parameters at baseline | OR     | CI           | P value |
|-------------------------------------|------------------------|--------|--------------|---------|
| <i>Clinical characteristics</i>     | Age                    | 1.002  | 0.967-1.002  | 0.967   |
|                                     | Sex                    | 3.65   | 0.912-14.621 | 0.067   |
|                                     | Killip class           | 3.487  | 1.984-6/127  | <0.0001 |
| <i>Biological parameters</i>        | Leukocytes             | 1      | 1.000-1.000  | 0.698   |
|                                     | Haemoglobin            | 0.929  | 0.779-1.108  | 0.464   |
|                                     | Glycemia               | 0.072  | 0.999-1.022  | 0.111   |
|                                     | Creatinine             | 3.032  | 0.173-53.026 | 0.447   |
|                                     | Cholesterol            | 0.992  | 0.98-1.005   | 0.227   |
|                                     | CK-MB max              | 1.005  | 1.003-1.008  | <0.0001 |
|                                     | 2D LVEF                | 0.816  | 0.730-0.912  | <0.0001 |
| <i>Echocardiographic parameters</i> | 2D LVEDV indexed       | 1.085  | 1.027-1.146  | 0.004   |
|                                     | 2D LVESV indexed       | 1.124  | 1.060-1.192  | <0.0001 |
|                                     | GLS LV                 | 2.34   | 1.533-3.587  | <0.0001 |
|                                     | 3D LVEF                | 0.775  | 0.678-0.886  | <0.0001 |
|                                     | 3D LVEDV indexed       | 1.076  | 1.017-1.137  | 0.01    |
|                                     | 3D LVESV indexed       | 1.127  | 1.058-1.200  | <0.0001 |
|                                     | E/e' ratio             | 1.855  | 1.379-2.494  | <0.0001 |
|                                     | GWI                    | 0.992  | 0.988-0.996  | <0.0001 |
|                                     | GCW                    | 0.995  | 0.991-0.998  | <0.0001 |
|                                     | GWW                    | 1.0008 | 1.002-1.014  | 0.007   |
|                                     | GWE                    | 0.810  | 0.716-0.917  | <0.0001 |

**Table S3.** Univariate and multivariate regression analysis of myocardial work indices (at baseline) as predictors of MACE.

|     | Univariate regression analysis |        |       |         | COX multivariate regression analysis |         |                                                              |
|-----|--------------------------------|--------|-------|---------|--------------------------------------|---------|--------------------------------------------------------------|
|     | Chi square                     | Wald   | OR    | P value | Wald                                 | P value | Chi-square for model                                         |
| GWI | 21.065                         | 13.9   | 0.992 | 0.000   | 5.909                                | 0.015   | 27.57<br>P value 0.0001<br>C statistic 0.938, CI 0.884-0.991 |
| GCW | 14.143                         | 9.131  | 0.995 | 0.003   | 0.452                                | 0.501   |                                                              |
| GWW | 7.435                          | 7.243  | 1.008 | 0.007   | -                                    | -       |                                                              |
| GWE | 19.45                          | 15.408 | 0.777 | 0.000   | 4.118                                | 0.042   |                                                              |

**Table S4.** ROC analysis for myocardial work indices at baseline as predictors for MACE at follow up.

|            | <i>AUC</i> | <i>P value</i> | <i>Cut off value</i> | <i>Sensibility</i> | <i>Specificity</i> |
|------------|------------|----------------|----------------------|--------------------|--------------------|
| <b>CWI</b> | 0.932      | 0.000          | 799                  | 88.9               | 92.7               |
| <b>GCW</b> | 0.862      | 0.001          | 1232                 | 88.9               | 82.9               |
| <b>GWW</b> | 0.812      | 0.004          | 186                  | 77.8               | 63.4               |
| <b>GWE</b> | 0.932      | 0.000          | 82.5                 | 88.9               | 80.5               |

**Table S5.** ROC analysis -performance of MACE prediction using miRNAs baseline values.

|                                             | <i>AUC</i> | <i>P value</i> | <i>Cut off value</i> | <i>Cut off value (Log 10)</i> | <i>Sensibility</i> | <i>Specificity</i> |
|---------------------------------------------|------------|----------------|----------------------|-------------------------------|--------------------|--------------------|
| <b>miR-223-3p</b>                           | 0.832      | 0.002          | 146113               | 5.164                         | 77.8%              | 87.8%              |
| <b>miR-142-3p</b>                           | 0.732      | 0.031          | 1115                 | 3.047                         | 77.8%              | 68.3%              |
| <b>miR-146a-5p</b>                          | 0.848      | 0.001          | 4155                 | 3.614                         | 88.9%              | 80.5%              |
| <b>miR-223-3p + miR-142-3p + miR146a-5p</b> | 0.865      | 0.000          |                      |                               |                    |                    |

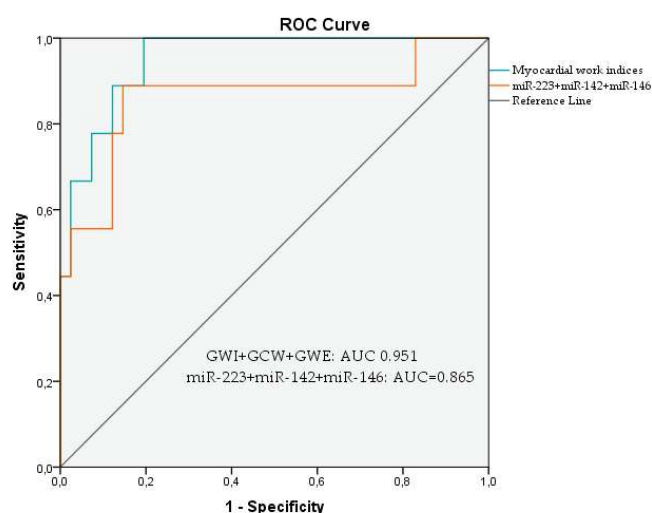**Figure S3.** ROC analysis for Cox regression models of myocardial work indices and miRNAs (baseline values) as predictors for MACE at follow up in young STEMI patients.**Table S6.** C-statistics, AIC and likelihood ratio test for incremental predictive values of MACE obtained for Model 2 by adding miRNAs.

|                                | <i>P value</i> | <i>Statistic log likelihood ratio</i> | <i>C-statistic</i>   | <i>AIC</i> | <i>Likelihood ratio test</i> |
|--------------------------------|----------------|---------------------------------------|----------------------|------------|------------------------------|
| Model 2 (age, sex, MW indices) | P<0.0001       | 30.377                                | 0.945 (0.903-0.987)  | 45.06      |                              |
| + miR-233-3p                   | P <0.001       | 35.928                                | 0.9603 (0.919-1.001) | 41.47      | 0.0181                       |
| + miR-142-3p                   | P<0.001        | 35.143                                | 0.9504 (0.905-0.995) | 41.93      | 0.0235                       |
| + miR-146a-5p                  | P<0.0001       | 42.512                                | 0.977 (0.956-0.999)  | 34         | 0.0003                       |

The likelihood ratio test compares the fit of a model with miRNAs to model 1.
